# Supplementary material
Source: Elsevier journal article supplement (https://www.sciencedirect.com/science/article/pii/S1138359318304337)
Supplement: mmc1 [file S1138359318304337:mmc1.docx]

**ANEXO 1:**

**ENQUESTA SOBRE EL CONSUM DE TABAC EN ALUMNES DE BATXILLERAT D’IES A LA COMARCA D’OSONA (BARCELONA).**Aquesta enquesta es realitza de forma anónima, i la seva finalitat és dur a terme una valoració del consum de tabac als alumnes de batxillerat.
Com ja sabeu, el l´hàbit de fumar és molt freqüent a la población general, i és habitual què es comenci a l´adolescència. Per aquest motiu s´ha intentat relacionar amb hàbits i conductes de l´ambient que ens envolta. Les dades de les vostres respostes seran tractats anónimament, respectant la vostra intimitat i després processats mitjançant estudis estadístics per completar el nostre estudi.Us preguem què les vostres respostes siguin sinceres per tal de no desvirtualitzar la qualitat del nostre estudi.

1) Génere: Home:…….. Dona:……..
2) Data de naixement: ……../……../……..
Lloc de residència: Rural/Urbà
3) Alçada:…….. Pes:……..
4) Fuma tabac: SI/NO.
Quan fa/ Data d´inici aproximat:…..../……../……..
5) Quàntes cigarretes fuma diàriament:……..i setmanalment:………o en caps de setmana:……..
6) A l´inici de l´hàbit a fumar Qui creu què va influïr més?:
Familiar / Amics – companys / No ho saps
7) ¿Consum o ha consumit d´altes sustàncies tóxiques?: SI / NO
8) Alcohol: SI / NO. Habitualment: SI / NO; En caps de setmana: SI / NO
9) ¿Desitjaria abandonar l´ hàbit de fumar? SI / NO / No ho sap
10) ¿Pateix alguna malaltia?: SI / NO / ¿Quina? (En lletres majúscules)………………………………………………………………………………
11) Nivell d´estudis del pare: Primaris / Medis / Superiors
12) Nivell d´estudios de la mare: Primaris / Medis / Superiors
13) ¿Fuma el pare?: SI /NO ¿Fuma la mare?: SI / NO
14) ¿Tè germans?: SI / NO. ¿Fuma algú familiar? : SI / NO
15) ¿Fumen els amics – companys?: SI / NO
16) Al seu entorn familiar / amistatss han sofert algun procés de càncer, malaltia respiratòria, malaltia cardiovascular: SI / NO.
17) Como ja hem expresat previament , respectant la seva intimitat; ¿Podries indicar la teva confessionalitat?:
Cristiana: SI / NO Islámica-Musulmana: SI / NO Altres: SI / NO

**Moltíssimes gràcies per la seva colaboració**
